# Supplementary material for: Density-dependence interacts with extrinsic mortality in shaping life histories
Source: PubMed Central journal article supplement (PMC5648222; doi:10.1371/journal.pone.0186661), 2017-10-19
Supplement: pone.0186661.s001.pdf [file pone.0186661.s001.pdf]

## S1. Interpolating fractional maturity ages

Resources allocated to reproduction are the product of density-dependent effects acting on fertility  $Q_R(N, x)$  and the production rate at adult size  $W_\tau$  (size at maturity):

$$m_x = Q_R(N, x) \psi(W_\tau, x) \left[ \mathbb{1}_{x > \lfloor \tau \rfloor}(x) + (\tau - \lfloor \tau \rfloor) \mathbb{1}_{x = \lfloor \tau \rfloor}(x) \right],$$

where  $\mathbb{1}_{t \geq \lfloor \tau \rfloor}(t)$  is an indicator function,  $\lfloor \tau \rfloor$  is a floor function, and  $(\tau - \lfloor \tau \rfloor)$  is a fractional part of  $\tau$ .

The term in the square bracket performs a simple interpolation when  $\tau$  is not an integer.
