# Supplementary material for: Density-dependence interacts with extrinsic mortality in shaping life histories
Source: PubMed Central journal article supplement (PMC5648222; doi:10.1371/journal.pone.0186661), 2017-10-19
Supplement: pone.0186661.s004.pdf [file pone.0186661.s004.pdf]

#### S4. Algorithm for searching ESS

We solve each case of the model for ESS  $\theta^* = \{\tau^*, z^*\}$  by invading consecutive strategies. If the invading strategy wins then it becomes the new resident strategy. In the first round the strategies for such a competition are taken from the set of possible combinations of  $\tau^I \in \{0, \Delta\tau^I, 2\Delta\tau^I, \dots, 120 - \Delta\tau^I, 120\}$  and  $z^I \in \{0, \Delta z^I, 2\Delta z^I, \dots, 1 - \Delta z^I, 1\}$ , where steps in a considered vector are  $\Delta\tau^I = 2$  and  $\Delta z^I = 0.02$ . When all pairs are checked for invasion then we get a first approximation of the ESS strategy  $\tau^{*I}$  and  $z^{*I}$ . In the next approximation new vectors of strategies are defined around  $\tau^{*I}$  and  $z^{*I}$ , each with a radius that equals 2 times the previous step for a considered vector:  $\tau^{II} \in \{\tau^{*I} - 2\Delta\tau^I, \tau^{*I} - 2\Delta\tau^I + \Delta\tau^{II}, \dots, \tau^{*I} + 2\Delta\tau^I - \Delta\tau^{II}, \tau^{*I} + 2\Delta\tau^I\}$ , where  $\Delta\tau^{II} = 4\Delta\tau^I/10$  is a new step; analogically  $z^{II} \in \{z^{*I} - 2\Delta z^I, z^{*I} - 2\Delta z^I + \Delta z^{II}, \dots, z^{*I} + 2\Delta z^I - \Delta z^{II}, z^{*I} + 2\Delta z^I\}$ , where  $\Delta z^{II} = 4\Delta z^I/10$ . Again, all possible pairs are checked for invasion giving the second approximation  $\tau^{*II}$  and  $z^{*II}$ . The third, fourth, and fifth approximations are done analogically to the second approximation.
